# Supplementary material
Source: PubMed Central journal article supplement (PMC3366774)

**Figure S1. The typical elution curves for purification of serum anti-phagocytic protein.** The ammonium sulphate precipitated serum protein was further purified by Capto Q, Con A, Heparin and Butyl column sequentially. The A280 absorbance (blue), conductivity (red) and the percentage of buffer B (elution buffer, green) in gradient elution are shown. The brown bars indicate the fractions which inhibited phagocytosis of beads by stimulated THP-1 cells.

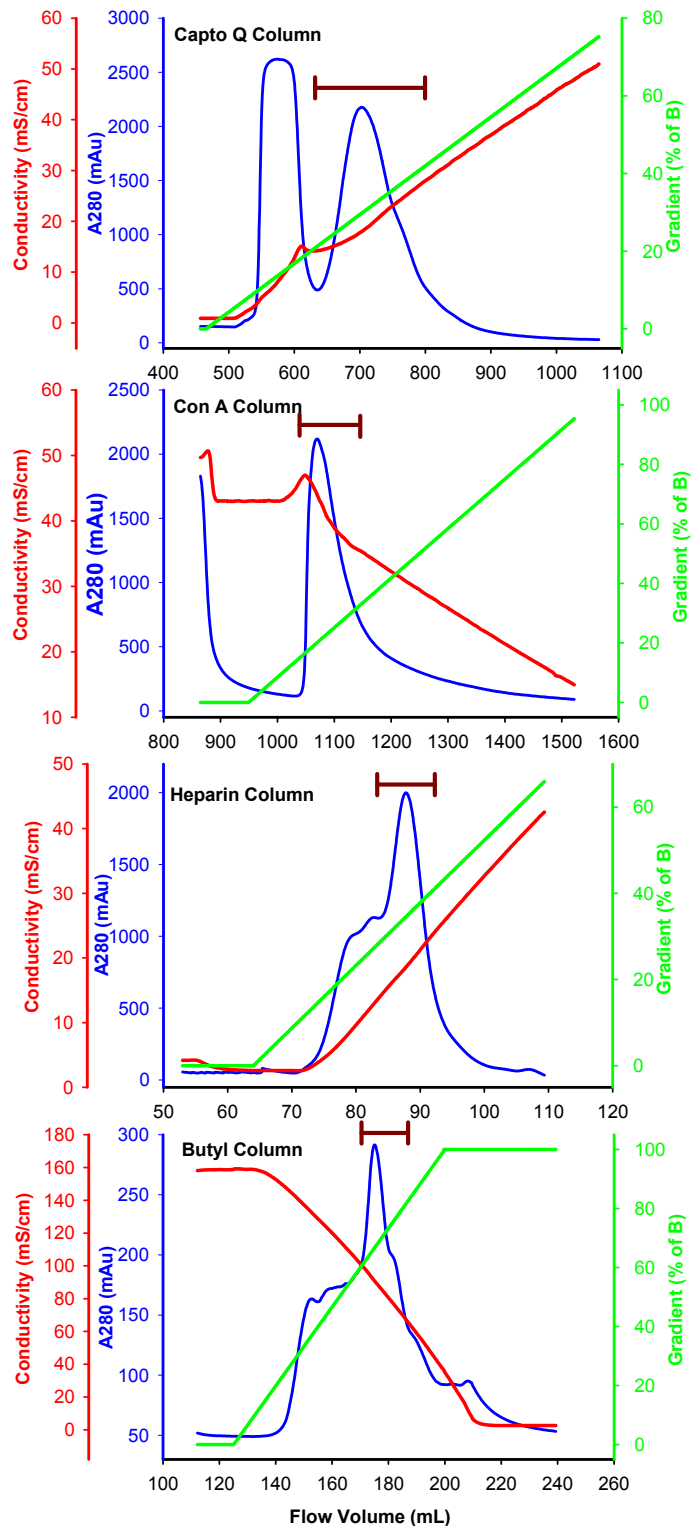

**Figure S2. The serum proteins separated by Superdex 200 gelfiltration.** Proteins eluted from size exclusion chromatography were separated by electrophoresis on SDS-PAGE and stained with colloidal Coomassie blue overnight before protein bands were cut and analysed by mass spectrometry. The major identified proteins were 1: complement factor H; 2: complement factor B, inter- $\alpha$ -trypsin inhibitor heavy chain H1, Ceruloplasmin and SAP; 3: Histidine-rich glycoprotein. Lane 1: starting material; Lane 2~9: fractions eluted from Superdex 200 gelfiltration. The relative inhibitory effect of each fraction on YG bead uptake by monocytes is indicated (- = no inhibition, + to +++ = increasing strength of inhibition).

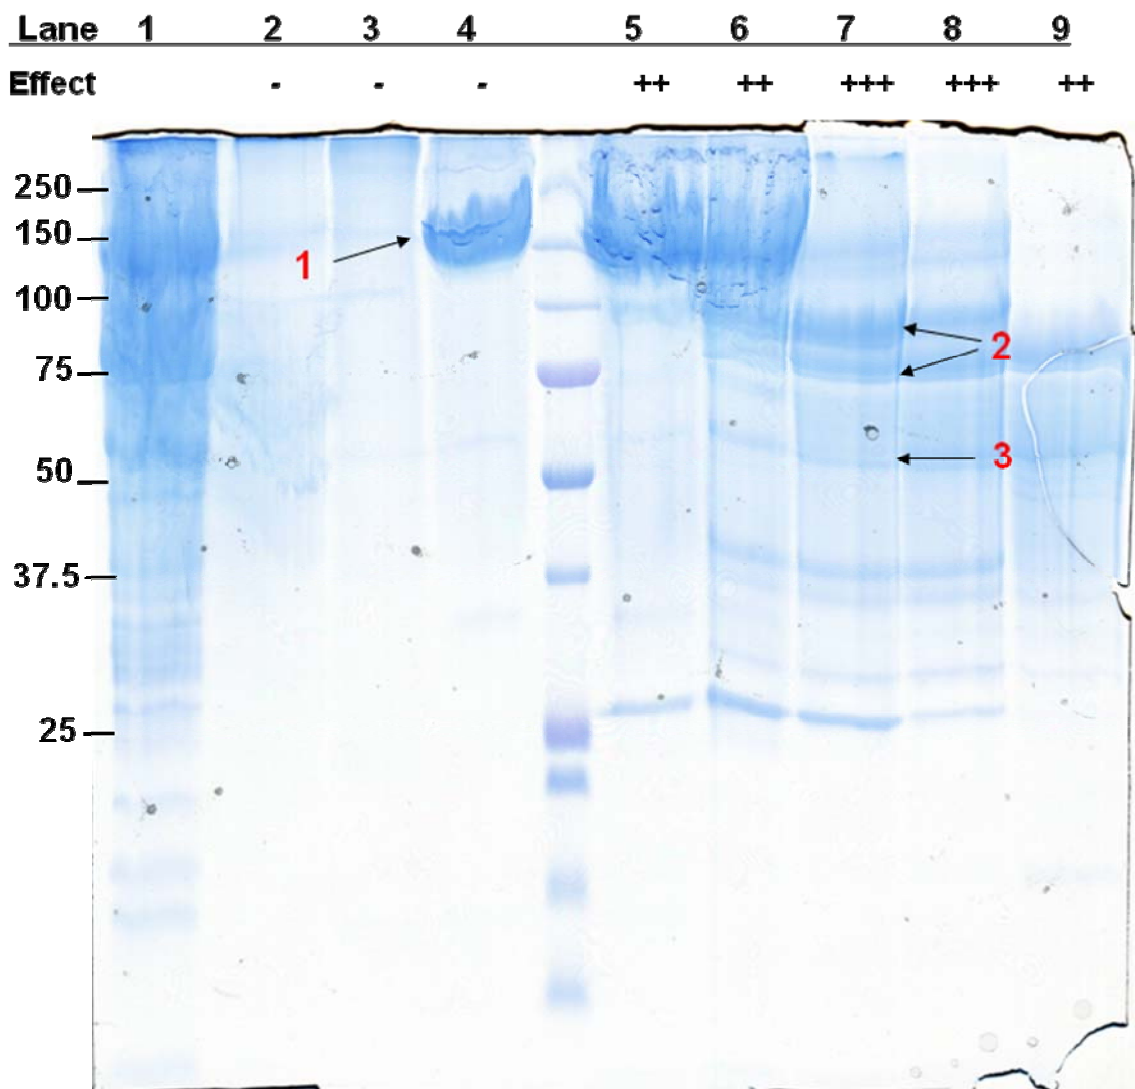

**Figure S3: The additive inhibitory effect of ceruloplasmin (Cp), serum amyloid P-component (SAP) and amyloid protein precursor (APP) on innate phagocytosis.** **a.** Flow cytometry dot plots of YG beads uptake by fresh human monocytes. Cells were treated with Cp (100  $\mu\text{g}/\text{mL}$ ), sAPP695 $\alpha$ , (100  $\mu\text{g}/\text{mL}$ ) and SAP (50  $\mu\text{g}/\text{mL}$ ) alone or the three glycoproteins together for 1 min prior to addition of beads. **b.** Flow cytometry histograms of phagocytosis of apoptotic lymphocytes by autologous macrophages. Macrophages were treated with Cp (100  $\mu\text{g}/\text{mL}$ ), sAPP695 $\alpha$ , (100  $\mu\text{g}/\text{mL}$ ) and SAP (50  $\mu\text{g}/\text{mL}$ ) alone or the three glycoproteins together for 1 min prior to addition of CFSE labeled apoptotic lymphocytes.

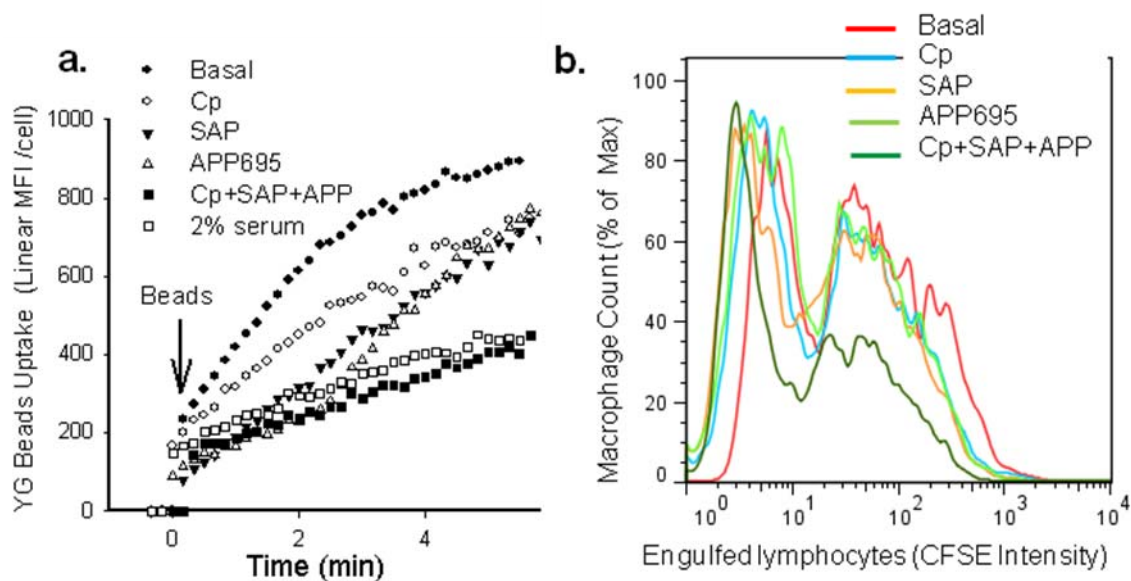

**Figure 4: Deglycosylated sAPP695 $\alpha$  retained its inhibitory effect on innate phagocytosis.** Soluble APP695 $\alpha$  was deglycosylated using the Glycofree Chemical Deglycosylation Kit (Prozyme, Hayward, CA) according to the manufacture's instruction. The deglycosylated APP695 $\alpha$  was completely dissolved in PBS at a concentration of 850  $\mu$ g/mL. **a.** Western blotting image shows the characterisitc size shift in protein band of sAPP695 $\alpha$  before (lane 1) and after (lane 2) deglycosylation. **b.** Flow cytometry dot plots of YG beads uptake by fresh human monocytes. Cells were treated with 100  $\mu$ g/mL sAPP695 $\alpha$  or deglycosylated sAPP695 $\alpha$  for 1 min prior to addition of beads. **c.** Flow cytometry histogram of phagocytosis of apoptotic lymphocytes by autologous macrophages. Macrophages were treated with 100  $\mu$ g/mL sAPP695 $\alpha$  or deglycosylated sAPP695 $\alpha$  for 1 min prior to addition of CFSE labeled apoptotic lymphocytes.

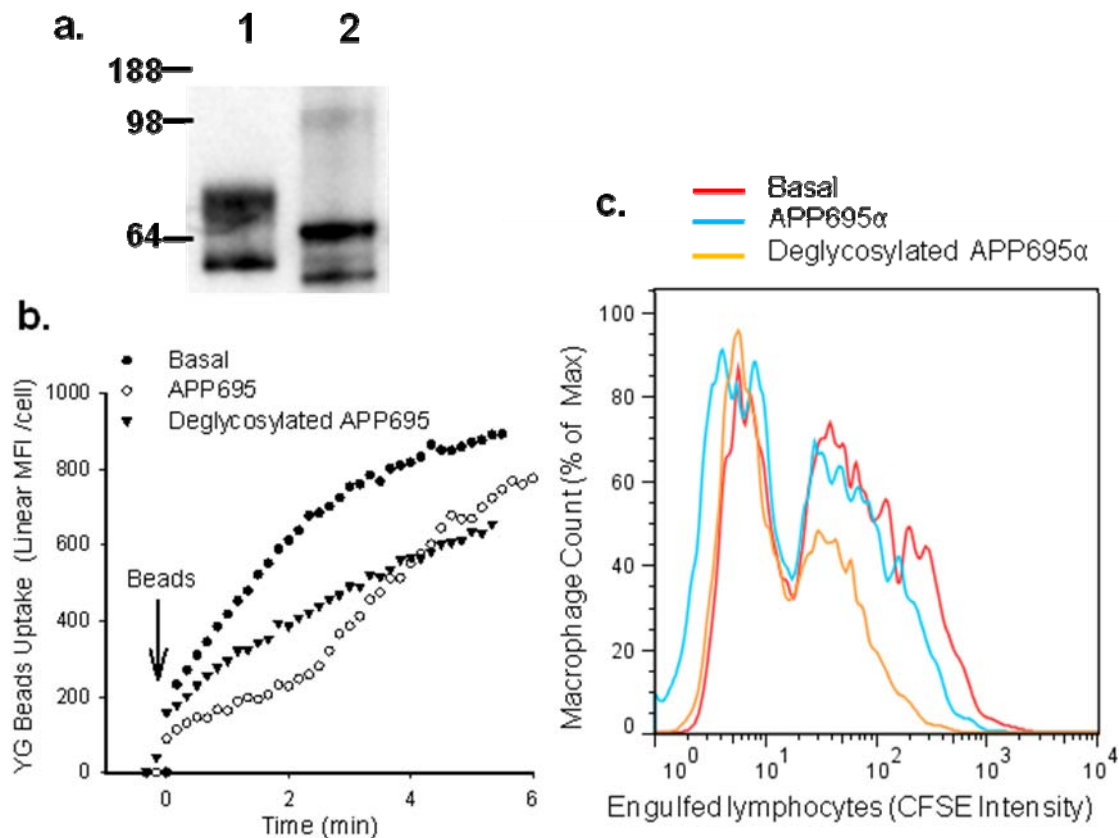

Supplement: supp_M112.340885_jbc.M112.340885-1.pdf [file supp_M112.340885_jbc.M112.340885-1.pdf]
